# Supplementary material
Source: MDPI journal article supplement (https://www.mdpi.com/search?q=molbank-2021-M1266)
Supplement: s002 [file molbank-2021-M1266-s002-mod.mol]

2a.mol
  corina  08052105113D 1   1.00000     0.00000 
CORINA 4.3.0 0026  30.10.2019
 18 19  0  0  0  0  0  0  0  0999 V2000
    0.7419    4.9791    1.7356 C   0  0  0  0  0  0  0  0  0  0  0  0
    0.0731    5.3936    2.8790 C   0  0  0  0  0  0  0  0  0  0  0  0
   -0.8493    4.5723    3.4913 C   0  0  0  0  0  0  0  0  0  0  0  0
   -1.1136    3.3146    2.9596 C   0  0  0  0  0  0  0  0  0  0  0  0
   -0.4329    2.8976    1.7999 C   0  0  0  0  0  0  0  0  0  0  0  0
    0.4991    3.7475    1.1960 C   0  0  0  0  0  0  0  0  0  0  0  0
   -2.0307    2.4725    3.5516 N   0  0  0  0  0  0  0  0  0  0  0  0
   -2.2855    1.2565    3.0374 C   0  0  0  0  0  0  0  0  0  0  0  0
   -1.6350    0.7932    1.8736 C   0  0  0  0  0  0  0  0  0  0  0  0
   -0.7181    1.5718    1.2479 C   0  0  0  0  0  0  0  0  0  0  0  0
   -3.1026    0.5384    3.5871 O   0  0  0  0  0  0  0  0  0  0  0  0
   -0.0127    1.0858    0.0080 C   0  0  0  0  0  0  0  0  0  0  0  0
   -0.7213    1.5711   -1.1789 N   0  0  0  0  0  0  0  0  0  0  0  0
   -0.2681    1.2584   -2.4090 C   0  0  0  0  0  0  0  0  0  0  0  0
   -0.9193    1.7044   -3.4998 O   0  0  0  0  0  0  0  0  0  0  0  0
    0.7281    0.5739   -2.5337 O   0  0  0  0  0  0  0  0  0  0  0  0
   -0.3746    1.3287   -4.7923 C   0  0  0  0  0  0  0  0  0  0  0  0
   -1.2420    1.9232   -5.9036 C   0  0  0  0  0  0  0  0  0  0  0  0
  1  2  2  0      
  2  3  1  0      
  3  4  2  0      
  4  5  1  0      
  5  6  2  0      
  6  1  1  0      
  4  7  1  0      
  7  8  1  0      
  8  9  1  0      
  9 10  2  0      
 10  5  1  0      
  8 11  2  0      
 10 12  1  0      
 12 13  1  0      
 13 14  1  0      
 14 15  1  0      
 14 16  2  0      
 15 17  1  0      
 17 18  1  0      
M  END
$$$$
