# Supplementary material
Source: MDPI journal article supplement (https://www.mdpi.com/search?q=molbank-2021-M1266)
Supplement: s002 [file molbank-2021-M1266-s002.inchi]

InChI=1S/C13H14N2O3/c1-2-18-13(17)14-8-9-7-12(16)15-11-6-4-3-5-10(9)11/h3-7H,2,8H2,1H3,(H,14,17)(H,15,16)
AuxInfo=1/1/N:18,17,1,2,6,3,9,12,10,5,4,8,14,13,7,11,16,15/rA:18CCCCCCNCCCOCNCOOCC/rB:d1;s2;d3;s4;s1d5;s4;s7;s8;s5d9;d8;s10;s12;s13;s14;d14;s15;s17;/rC:-3.3342,-1.54,0;-3.3342,-3.08,0;-2.0005,-3.85,0;-.6668,-3.08,0;-.6668,-1.54,0;-2.0005,-.77,0;.6668,-3.85,0;2.0005,-3.08,0;2.0005,-1.54,0;.6668,-.77,0;3.3296,-3.8474,0;.6668,.77,0;-.6668,1.54,0;-.6668,3.08,0;.6668,3.85,0;-2.0005,3.85,0;2.0005,3.08,0;3.3342,3.85,0;
