# Supplementary material
Source: MDPI journal article supplement (https://www.mdpi.com/search?q=molbank-2021-M1266)
Supplement: s003 [file molbank-2021-M1266-s003.inchi]

InChI=1S/C14H16N2O3/c1-2-19-14(18)15-8-7-10-9-13(17)16-12-6-4-3-5-11(10)12/h3-6,9H,2,7-8H2,1H3,(H,15,18)(H,16,17)
AuxInfo=1/1/N:19,18,1,2,6,3,12,13,9,10,5,4,8,15,14,7,11,16,17/rA:19CCCCCCNCCCOCCNCOOCC/rB:d1;s2;d3;s4;s1d5;s4;s7;s8;s5d9;d8;s10;s12;s13;s14;d15;s15;s17;s18;/rC:-1.9983,-2.31,0;-1.9983,-3.85,0;-.6645,-4.62,0;.6692,-3.85,0;.6692,-2.31,0;-.6645,-1.54,0;2.0027,-4.62,0;3.3365,-3.85,0;3.3365,-2.31,0;2.0027,-1.54,0;4.6655,-4.6174,0;2.0027,0,0;.6692,.77,0;.6692,2.31,0;-.6645,3.08,0;-.6645,4.62,0;-1.9983,2.31,0;-3.3318,3.08,0;-4.6655,2.31,0;
