# Supplementary material
Source: MDPI journal article supplement (https://www.mdpi.com/search?q=molbank-2021-M1266)
Supplement: s003 [file molbank-2021-M1266-s003.mol]

2b.mol
  ChemDraw06142101042D

 19 20  0  0  0  0  0  0  0  0999 V2000
   -1.0705   -1.2375    0.0000 C   0  0  0  0  0  0  0  0  0  0  0  0
   -1.0705   -2.0625    0.0000 C   0  0  0  0  0  0  0  0  0  0  0  0
   -0.3560   -2.4750    0.0000 C   0  0  0  0  0  0  0  0  0  0  0  0
    0.3585   -2.0625    0.0000 C   0  0  0  0  0  0  0  0  0  0  0  0
    0.3585   -1.2375    0.0000 C   0  0  0  0  0  0  0  0  0  0  0  0
   -0.3560   -0.8250    0.0000 C   0  0  0  0  0  0  0  0  0  0  0  0
    1.0729   -2.4750    0.0000 N   0  0  0  0  0  0  0  0  0  0  0  0
    1.7874   -2.0625    0.0000 C   0  0  0  0  0  0  0  0  0  0  0  0
    1.7874   -1.2375    0.0000 C   0  0  0  0  0  0  0  0  0  0  0  0
    1.0729   -0.8250    0.0000 C   0  0  0  0  0  0  0  0  0  0  0  0
    2.4994   -2.4736    0.0000 O   0  0  0  0  0  0  0  0  0  0  0  0
    1.0729    0.0000    0.0000 C   0  0  0  0  0  0  0  0  0  0  0  0
    0.3585    0.4125    0.0000 C   0  0  0  0  0  0  0  0  0  0  0  0
    0.3585    1.2375    0.0000 N   0  0  0  0  0  0  0  0  0  0  0  0
   -0.3560    1.6500    0.0000 C   0  0  0  0  0  0  0  0  0  0  0  0
   -0.3560    2.4750    0.0000 O   0  0  0  0  0  0  0  0  0  0  0  0
   -1.0705    1.2375    0.0000 O   0  0  0  0  0  0  0  0  0  0  0  0
   -1.7849    1.6500    0.0000 C   0  0  0  0  0  0  0  0  0  0  0  0
   -2.4994    1.2375    0.0000 C   0  0  0  0  0  0  0  0  0  0  0  0
  1  2  2  0      
  2  3  1  0      
  3  4  2  0      
  4  5  1  0      
  5  6  2  0      
  6  1  1  0      
  4  7  1  0      
  7  8  1  0      
  8  9  1  0      
  9 10  2  0      
 10  5  1  0      
  8 11  2  0      
 10 12  1  0      
 12 13  1  0      
 13 14  1  0      
 14 15  1  0      
 15 16  2  0      
 15 17  1  0      
 17 18  1  0      
 18 19  1  0      
M  END
