# Supplementary material
Source: MDPI journal article supplement (https://www.mdpi.com/search?q=molbank-2021-M1266)
Supplement: s004 [file molbank-2021-M1266-s004.inchi]

InChI=1S/C15H18N2O3/c1-2-20-15(19)16-9-5-6-11-10-14(18)17-13-8-4-3-7-12(11)13/h3-4,7-8,10H,2,5-6,9H2,1H3,(H,16,19)(H,17,18)
AuxInfo=1/1/N:20,19,1,2,13,12,6,3,14,9,10,5,4,8,16,15,7,11,17,18/rA:20CCCCCCNCCCOCCCNCOOCC/rB:d1;s2;d3;s4;s1d5;s4;s7;s8;s5d9;d8;s10;s12;s13;s14;s15;d16;s16;s18;s19;/rC:-3.3318,-2.6949,0;-3.3318,-4.2351,0;-1.9983,-5.0051,0;-.6645,-4.2351,0;-.6645,-2.6949,0;-1.9983,-1.9249,0;.6692,-5.0051,0;2.0029,-4.2351,0;2.0029,-2.6949,0;.6692,-1.9249,0;3.3318,-5.0023,0;.6692,-.3849,0;-.6645,.3851,0;-.6645,1.9251,0;-1.9983,2.6951,0;-1.9983,4.2351,0;-3.3318,5.0051,0;-.6645,5.0051,0;.6692,4.2351,0;2.0027,5.0051,0;
